# Supplementary material for: Rewarming rats at 37˚C rescues hypothermia with significant changes in IL-1β levels in the intestinal tissue and blood
Source: Research Square preprint supplement (doi:10.21203/rs.3.rs-396184/v1), 2021-04-07
Supplement: Supplementary file 1 [file a353cc0fae1e07f04cbdb114.xlsx]

## Sheet:  Table SII
Table SII: Survival number of rats in each group rewarming with 37℃ warm water
Group	0min	10min	30min	60min	90min	120min	180min	240min	360min	480min	720min
R2	7	7	7	7	7	7	/	/	/	/	/
R6	7	7	7	7	7	7	7	7	7	/	/
R12	8	8	8	8	8	8	8	8	8	8	8
R2, R6, R12: 15°C seawater immersion for 5 h, and rewarming in 37°C water for 2, 6, 12 h respectively.
